# Supplementary figures and images for: On reconciling the interactions between APETALA2 , miR172 and AGAMOUS with the ABC model of flower development
Source: Oxford University Press journal article supplement (doi:10.1242/dev.036673), 2010-09-28

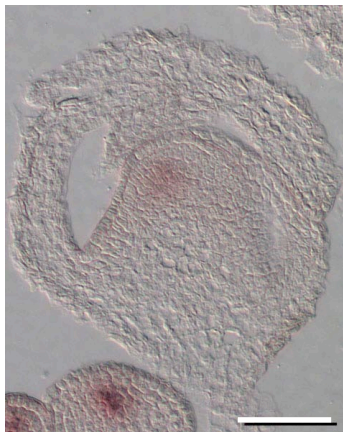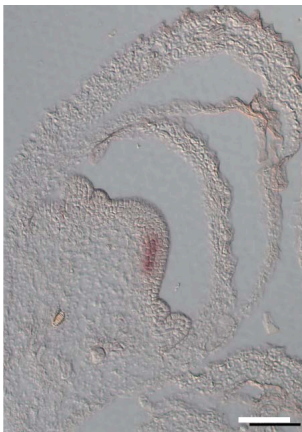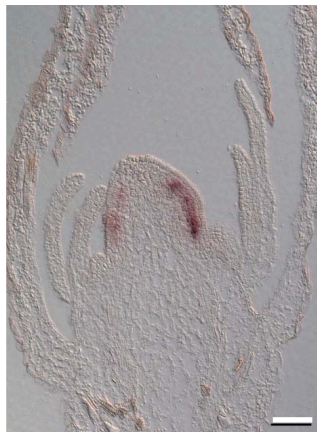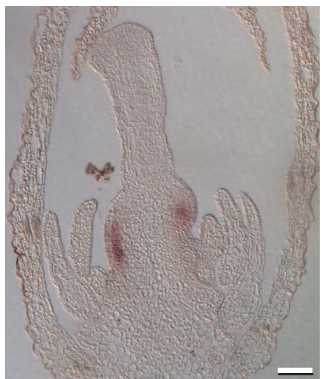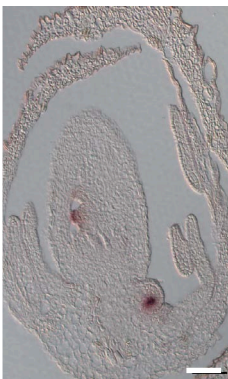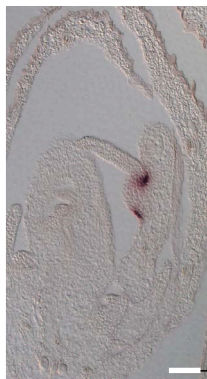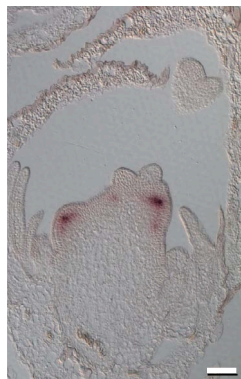

Supplement: dev036673figs3.pdf [file dev036673figs3.pdf]
